# Supplementary material
Source: HighWire-hosted journal article supplement (https://bmjopen.bmj.com/content/8/5/e018211)
Supplement: inline-supplementary-material-1 [file inline-supplementary-material-1.pdf]

Table S1. Mean K6 score at each phase of the study according to the period of residence in prefabricated temporary housing employing the Linear mixed model (n=434)

|                                | Period of residence in prefabricated temporary housing (years) |            |                                                          |
|--------------------------------|----------------------------------------------------------------|------------|----------------------------------------------------------|
|                                | <3y                                                            | 3-4y       | >4y<br>(Still living in prefabricated temporary housing) |
| Study phase                    | Mean K6 score (SE)                                             |            |                                                          |
| 1 <sup>st</sup> phase (n=434)  | 6.5 (0.34)                                                     | 6.3 (0.46) | 6.8 (0.60)                                               |
| 2 <sup>nd</sup> phase (n=303)  | 6.0 (0.49)                                                     | 5.8 (0.50) | 6.7 (0.70)                                               |
| 3 <sup>rd</sup> phase (n=286)  | 5.8 (0.44)                                                     | 6.7 (0.56) | 7.1 (0.73)                                               |
| 4 <sup>th</sup> phase (n=247)  | 5.5 (0.53)                                                     | 5.2 (0.50) | 5.9 (0.67)                                               |
| 5 <sup>th</sup> phase (n=288)  | 5.9 (0.43)                                                     | 5.0 (0.51) | 6.2 (0.76)                                               |
| 6 <sup>th</sup> phase (n=310)  | 5.2 (0.42)                                                     | 5.5 (0.51) | 6.5 (0.85)                                               |
| 7 <sup>th</sup> phase (n=265)  | 5.5 (0.47)                                                     | 5.5 (0.61) | 6.4 (0.91)                                               |
| 8 <sup>th</sup> phase (n=284)  | 4.6 (0.41)                                                     | 5.1 (0.49) | 7.0 (1.05)                                               |
| 9 <sup>th</sup> phase (n=248)  | 4.8 (0.45)                                                     | 4.9 (0.56) | 5.9 (0.98)                                               |
| 10 <sup>th</sup> phase (n=284) | 4.6 (0.43)                                                     | 4.6 (0.47) | 7.8 (1.08)                                               |
| P-interaction*                 |                                                                | 0.882      | 0.011                                                    |

\* P-interaction = number of phase  $\times$  dummy variable of exposure (the period of residence in prefabricated temporary housing)

Multivariate adjusted model = the period of residence in prefabricated temporary housing (3-4y), the period of residence in prefabricated temporary housing (>4y), phase, age, sex, K6 score (1<sup>st</sup> phase), economic status (poorest), economic status (missing), social ties (weak ties), social ties (missing), health status (bad health), health status (missing), the period of residence in prefabricated temporary housing (3-4y)\*phase, the period of residence in prefabricated temporary housing (>4y)\*phase, phase\*age, phase\*sex, phase\* k6 score (1<sup>st</sup> phase), phase\* health status (bad health), phase\* health status (missing), phase\* social ties (weak ties), phase\* social ties (missing), phase\* economic status (poorest), phase\* economic status (missing), and phase\*phase

Table S2. Association between period of residence in prefabricated housing and psychological distress stratified by sex.

|                                                     | Period of residence in prefabricated temporary housing (years) |                  |                                                          | p-trend | p-interaction |
|-----------------------------------------------------|----------------------------------------------------------------|------------------|----------------------------------------------------------|---------|---------------|
|                                                     | <3y                                                            | 3-4y             | >4y<br>(Still living in prefabricated temporary housing) |         |               |
| <b>Men</b>                                          |                                                                |                  |                                                          |         |               |
| No. of subjects                                     | 76                                                             | 45               | 17                                                       |         |               |
| No. of subjects with higher psychological distress* | 28                                                             | 16               | 11                                                       |         |               |
| Crude OR (95% CI)                                   | 1.00 (reference)                                               | 0.95 (0.44-2.03) | 3.01 (1.06-9.22)                                         | 0.115   |               |
| Age adjusted OR (95% CI)                            | 1.00 (reference)                                               | 0.95 (0.44-2.02) | 3.61 (1.23-11.53)                                        | 0.081   |               |
| Multivariate adjusted OR (95% CI)†                  | 1.00 (reference)                                               | 0.76 (0.31-1.81) | 3.62 (1.14-12.43)                                        | 0.143   | 0.124         |
| <b>Women</b>                                        |                                                                |                  |                                                          |         |               |
| No. of subjects                                     | 70                                                             | 56               | 20                                                       |         |               |
| No. of subjects with higher psychological distress* | 33                                                             | 29               | 16                                                       |         |               |
| Crude OR (95% CI)                                   | 1.00 (reference)                                               | 1.20 (0.60-2.42) | 4.10 (1.40-14.39)                                        | 0.028   |               |
| Age adjusted OR (95% CI)                            | 1.00 (reference)                                               | 1.29 (0.64-2.63) | 4.68 (1.56-16.77)                                        | 0.016   |               |
| Multivariate adjusted OR (95% CI)‡                  | 1.00 (reference)                                               | 1.62 (0.74-3.65) | 3.94 (1.12-16.45)                                        | 0.037   |               |

OR, odds ratio; CI, confidence interval

\* Higher psychological distress was defined as K6 score  $\geq 5$  at the follow-up survey (2016).

<sup>†</sup> Adjustment items were age, K6 score at baseline, subjective economic status (poorest, fair to poorer, or missing), social ties (strong ties, weak ties, or missing), and self-rated health (good health, bad health, or missing).

<sup>‡</sup> Adjustment items were age, K6 score at baseline, subjective economic status (poorest, fair to poorer, or missing), social ties (strong ties, weak ties, or missing), and self-rated health (good health, bad health, or missing). We conducted these analyses among 145 women excluded one participant who had no data on social ties because we were unable to estimate multivariate OR (95% CI) when including her.

Table S3. Association between period of residence in prefabricated temporary housing and psychological distress (cut-off value for K6 score is 13 points).

|                                                                 | Period of residence in prefabricated temporary housing (years) |                  |                                                          | p-trend |
|-----------------------------------------------------------------|----------------------------------------------------------------|------------------|----------------------------------------------------------|---------|
|                                                                 | <3y                                                            | 3-4y             | >4y<br>(Still living in prefabricated temporary housing) |         |
| No. of subjects                                                 | 146                                                            | 101              | 37                                                       |         |
| No. of subjects with higher psychological distress <sup>*</sup> | 8                                                              | 8                | 7                                                        |         |
| Crude OR (95% CI)                                               | 1.00 (reference)                                               | 1.48 (0.54-4.04) | 4.01 (1.36-11.64)                                        | 0.018   |
| Age-sex adjusted OR (95% CI)                                    | 1.00 (reference)                                               | 1.46 (0.54-4.00) | 4.12 (1.37-12.30)                                        | 0.018   |
| Multivariate adjusted OR (95% CI) <sup>†</sup>                  | 1.00 (reference)                                               | 1.31 (0.45-3.80) | 3.60 (1.14-11.28)                                        | 0.037   |

OR, odds ratio; CI, confidence interval

<sup>\*</sup> Higher psychological distress was defined as K6 score  $\geq 5$  at the follow-up survey (2016).

<sup>†</sup> Adjustment items were age, sex, K6 score at baseline, subjective economic status (poorest, fair to poorer, or missing), social ties (strong ties, weak ties, or missing), and self-rated health (good health, bad health, or missing).
